# Supplementary material for: Targeting ceramide synthase 6–dependent metastasis-prone phenotype in lung cancer cells
Source: JCI journal article supplement (doi:10.1172/jci79775), 2015-12-07
Supplement: sd1 [file 1]

## Supplementary Table 1

| Gene          | Probe          | Med_NSCLC | Med_NL | T test   | Logrank overall | Logrank relapse free | Pathway           |
|---------------|----------------|-----------|--------|----------|-----------------|----------------------|-------------------|
| <i>CERS6</i>  | AA758229_r_271 | 0.25      | -0.32  | 8.40E-06 | 0.006           | 0.012                | de novo synthesis |
| <i>SMPD2</i>  | A_23_P82159    | 0.21      | 0.52   | 6.58E-04 | 0.11            | 0.084                | Sphingomyelin     |
| <i>DEGS1</i>  | A_23_P126186   | -0.16     | -0.07  | 0.145    | 0.115           | 0.031                | de novo synthesis |
| <i>SMPD3</i>  | A_23_P152186   | 0.12      | 0.11   | 0.375    | 0.118           | 0.415                | Sphingomyelin     |
| <i>GBA2</i>   | A_23_P18672    | -0.11     | -0.33  | 0.018    | 0.131           | 0.011                | HexCer (GlcCer)   |
| <i>CERS4</i>  | A_23_T8322     | 0.13      | 0.13   | 0.328    | 0.15            | 0.215                | de novo synthesis |
| <i>SPTLC1</i> | A_23_P43326    | 0.29      | 0.49   | 1.40E-04 | 0.154           | 0.321                | de novo synthesis |
| <i>SMPD1</i>  | A_23_P203488   | -0.25     | 1.46   | 2.45E-04 | 0.18            | 0.576                | Sphingomyelin     |
| <i>PHCA</i>   | A_23_P203665   | 0.13      | 0.14   | 0.917    | 0.218           | 0.136                | S1P               |
| <i>CERS1</i>  | A_23_T30909    | -0.51     | -0.39  | 0.365    | 0.259           | 0.461                | de novo synthesis |
| <i>TMEM23</i> | A_23_P115616   | 0.36      | 0.39   | 0.113    | 0.296           | 0.631                | Sphingomyelin     |
| <i>CERK</i>   | A_23_P211659   | -0.02     | -0.26  | 0.006    | 0.331           | 0.474                | C1P               |
| <i>TMEM23</i> | A_23_P149791   | 0.1       | 0.85   | 0.073    | 0.339           | 0.585                | Sphingomyelin     |
| <i>UGT8</i>   | A_23_P61346    | -0.74     | -1.52  | 0.003    | 0.368           | 0.315                | HexCer (GalCer )  |
| <i>CERS3</i>  | A_23_T5195     | 0.16      | 0.05   | 0.041    | 0.455           | 0.483                | de novo synthesis |
| <i>GALC</i>   | A_23_P25964    | 0.16      | 0.93   | 0.001    | 0.457           | 0.695                | HexCer (GalCer )  |
| <i>GCS</i>    | A_23_P123645   | -0.7      | -0.2   | 0.087    | 0.46            | 0.743                | HexCer (GlcCer)   |
| <i>TMEM23</i> | AK026683_2141  | 0.07      | 0.21   | 3.92E-04 | 0.554           | 0.543                | Sphingomyelin     |
| <i>SMPD3</i>  | A_23_P163567   | -0.93     | -1.01  | 0.012    | 0.701           | 0.969                | Sphingomyelin     |
| <i>SPTLC2</i> | A_23_P3146     | 0.33      | 0.89   | 0.012    | 0.721           | 0.808                | de novo synthesis |
| <i>CERS1</i>  | A_23_T8203     | 0.86      | 1.33   | 2.15E-04 | 0.741           | 0.734                | de novo synthesis |
| <i>GBA3</i>   | A_23_P216536   | 0         | 0.13   | 0.017    | 0.761           | 0.355                | HexCer (GlcCer)   |
| <i>SPHK1</i>  | A_23_P38106    | -0.38     | 0.02   | 0.018    | 0.775           | 0.553                | S1P               |
| <i>CERS2</i>  | A_23_T810      | -0.05     | 0.14   | 0.048    | 0.816           | 0.92                 | de novo synthesis |
| <i>ASAH2</i>  | A_23_P161171   | -0.35     | -0.65  | 0.003    | 0.89            | 0.812                | S1P               |
| <i>UGT8</i>   | A_23_P72747    | -1.06     | -2.31  | 2.77E-04 | 0.943           | 0.867                | HexCer (GalCer )  |
| <i>SPHK2</i>  | A_23_P208719   | -0.46     | -0.21  | 1.46E-05 | 0.955           | 0.445                | S1P               |
| <i>CERS5</i>  | A_23_T4171     | -0.08     | -0.1   | 0.835    | 0.979           | 0.847                | de novo synthesis |

### Altered ceramide metabolic gene expression in cancer tissues

Gene expression levels in ceramide metabolic pathways were compared among 149 NSCLC specimens and 5 normal lung mixtures. Genes with background levels or those without detection probes on the chip are not shown. *CERS6* expression level was associated with both overall and relapse-free survival. S1P, sphingosine-1-phosphate; C1P, ceramide-1-phosphate; HexCer, monohexosylceramide; GalCer, galactosylceramide; GlcCer, glucosylceramide.

## Supplementary Table 2

### Immunohistochemical expression of CERS6 in NSCLC and normal lung specimens

| Lung Specimen(Lx) | Cancer | Normal lung        |                                       |
|-------------------|--------|--------------------|---------------------------------------|
|                   |        | Type II pneumocyte | Pseudo-stratified ciliated epithelium |
| AD (L1)           | 2      | 0                  | 0                                     |
| AD (L2)           | 1      | 0                  | 0                                     |
| AD (L3)           | 2      | 0                  | 0                                     |
| AD (L4)           | 1      | 0                  | 0                                     |
| AD (L5)           | 1      | 0                  | 0                                     |
| AD (L6)           | 1      | 0                  | 0                                     |
| AD (L7)           | 2      | 0                  | 1                                     |
| AD (L8)           | 1      | 0                  | 0                                     |
| AD (L9)           | 2      | 0                  | 0                                     |
| AD (L10)          | 0      | 0                  | 0                                     |
| AD (L11)          | 1      | 0                  | 0                                     |
| AD (L12)          | 0      | 0                  | 0                                     |
| AD (L13)          | 1      | 0                  | 0                                     |
| AD (L14)          | 1      | 0                  | 0                                     |
| SCC (L15)         | 2      | 0                  | 0                                     |
| SCC (L16)         | 2      | 0                  | 0                                     |
| SCC (L17)         | 2      | 0                  | 0                                     |
| SCC (L18)         | 2      | 0                  | 0                                     |
| SCC (L19)         | 0      | 0                  | 0                                     |
| SCC (L20)         | 2      | 0                  | 0                                     |
| SCC (L21)         | 2      | 0                  | 1                                     |
| SCC (L22)         | 2      | 0                  | 0                                     |
| SCC (L23)         | 2      | 0                  | 0                                     |
| SCC (L24)         | 1      | 0                  | 0                                     |
| SCC (L25)         | 2      | 0                  | 0                                     |
| SCC (L26)         | 2      | 0                  | 0                                     |
| SCC (L27)         | 1      | 0                  | 0                                     |

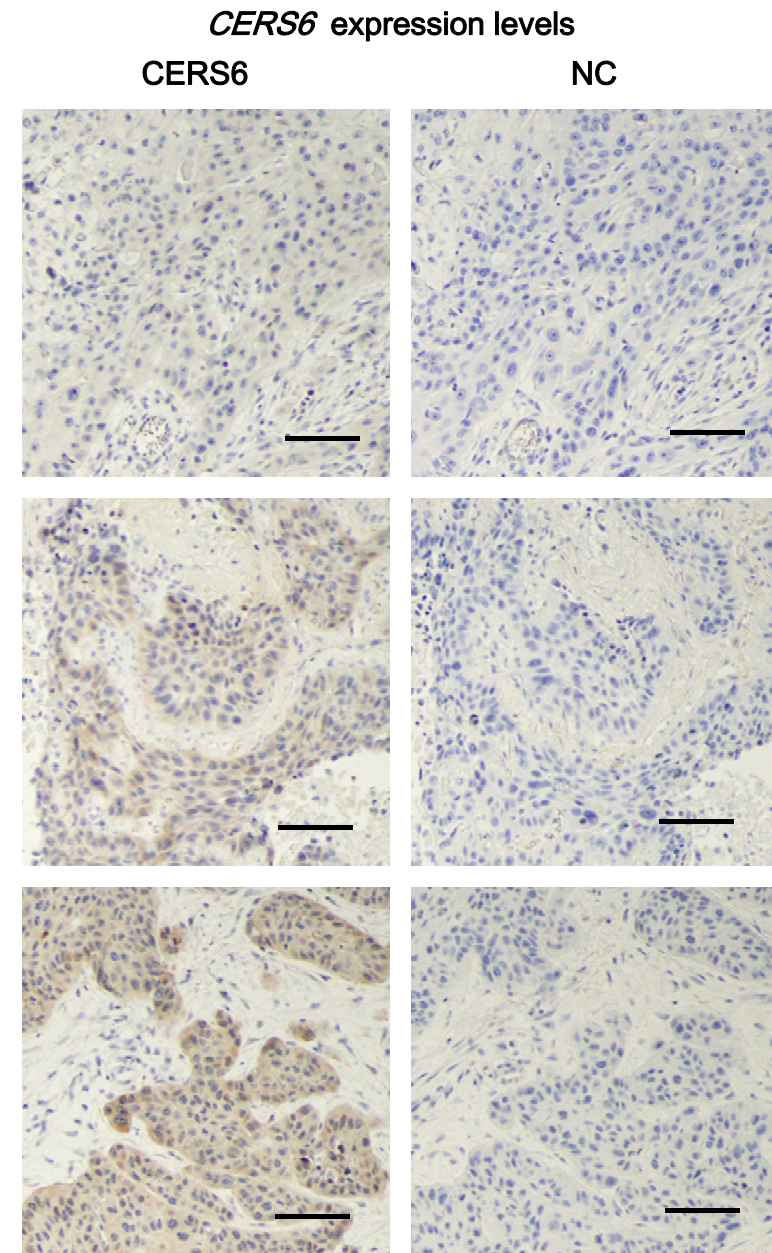

#### CERS6 protein highly expressed in NSCLC specimens.

Formalin-fixed paraffin sections were subjected to an immunoperoxidase study using an avidin-biotin peroxidase complex method. The CERS6 monoclonal antibody was used after antigen retrieval following microwave oven heating treatment. IHC stained slides were interpreted and scored on a scale ranging from 0 to 2, with samples with a staining score of 0 considered negative, and that of 1 and 2 weakly and strongly positive, respectively. Examples are shown in the right panels. AD, adenocarcinoma; SCC, squamous cell carcinoma. Bar, 0.2 mm.

## Supplementary Table 3

| Experiment                           | Name                | Sequence                                                   |
|--------------------------------------|---------------------|------------------------------------------------------------|
| Luciferase vector construction       | CERS6 WT-3'UTR F    | ATCGATCTGAGTCTAGACTCCTGCTCCATGGATGATT                      |
|                                      | CERS6 WT-3'UTR R    | ATCGATCGAGGGGCCCCGCAATTTCAAATGGGCACT                       |
|                                      | CERS6 MUT-3'UTR F   | CAGTATTTGCATTTGGTCTTAGAATATTA                              |
|                                      | CERS6 MUT-3'UTR R   | TAATATTCTAAGACCAAATGCAAATACTG                              |
|                                      | CERS6 WT-3'UTR seqF | CTCCTGCTCCATGGATGATT                                       |
|                                      | CERS6 WT-3'UTR seqR | GCAATTTCAAATGGGCACT                                        |
| siRNA (forward sequence only)        | CERS5 siRNA-1       | r(CAAGUAUCCUGAUAAAGAAA)dTdT                                |
|                                      | CERS5 siRNA-2       | r(GGAGUAUCAAGAAAGCAAA)dTdT                                 |
|                                      | CERS6 siRNA-1       | r(AAGGUCUUCACUGCAAUUACA)dTdT                               |
|                                      | CERS6 siRNA-2       | r(CAACUGACCUUCACUACUA)dTdT                                 |
|                                      | CERS6 siRNA-3       | r(GUGUGArCUCCUGUUUGUU)dTdT                                 |
| sh construct (forward sequence only) | CERS6 shRNA-2       | GCAGGCCAATGGACCACAAATTCtgaGAATTTGTGGTCCATTGGCC<br>TGTTTTTT |
|                                      | CERS6 shRNA-3       | GCGGACGAACTAGGTGTTTAATCtgaGATTAAACACCTAGTTCGTC<br>CGTTTTTT |
| Real-time PCR                        | CERS5 F1            | GTTCTGGGACATCCGACAGT                                       |
|                                      | CERS5 R1            | CCAATAGAAGGCCAATTCCA                                       |

## Supplementary Table 4

| Precursor ion <i>m/z</i> (Q1) | Product ion <i>m/z</i> (Q3) |
|-------------------------------|-----------------------------|
| 538.5                         | 264.5                       |
| 562.7                         | 264.5                       |
| 562.7                         | 265.4                       |
| 562.7                         | 287.5                       |
| 562.7                         | 288.5                       |
| 563.7                         | 264.5                       |
| 563.7                         | 264.5                       |
| 563.7                         | 288.5                       |
| 563.7                         | 289.5                       |
| 564.7                         | 264.5                       |
| 564.7                         | 265.4                       |
| 564.7                         | 289.5                       |
| 564.7                         | 290.6                       |
| 565.7                         | 264.5                       |
| 565.7                         | 265.4                       |
| 565.7                         | 290.6                       |
| 565.7                         | 291.6                       |
| 592.9                         | 291.6                       |

## Supplementary Fig. 1

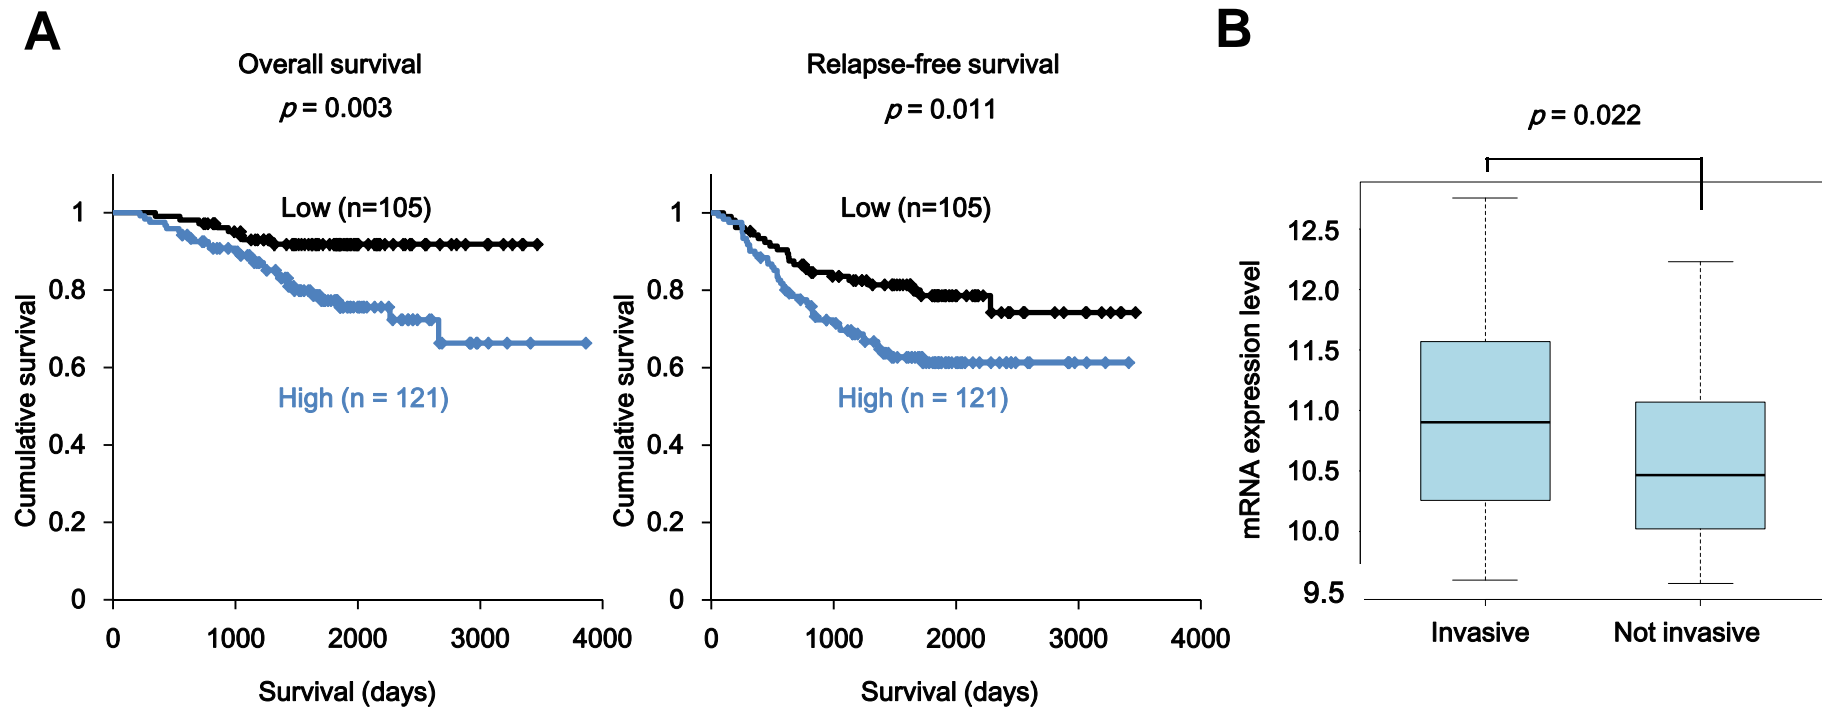

### ***CERS6* expression in breast cancer specimens.**

(A) Kaplan-Meier analysis of mRNA expression level of *CERS6* and prognosis (data from Cancer Res 2012;72:100-111). The high and low groups were classified by *CERS6* expression level relative to the median value. Cases lacking clinical information were omitted from the analysis. (B) Box plot analysis showing mRNA expression levels of *CERS6* and invasiveness. Using a breast cancer data set (J Natl Cancer Inst. 2011;103:264-72), *CERS6* expression levels were plotted into the 'Invasive' (n=69), and 'Not invasive' groups (n=28).  $p$  values were calculated using a two-tailed t test.

## Supplementary Fig. 2

### A

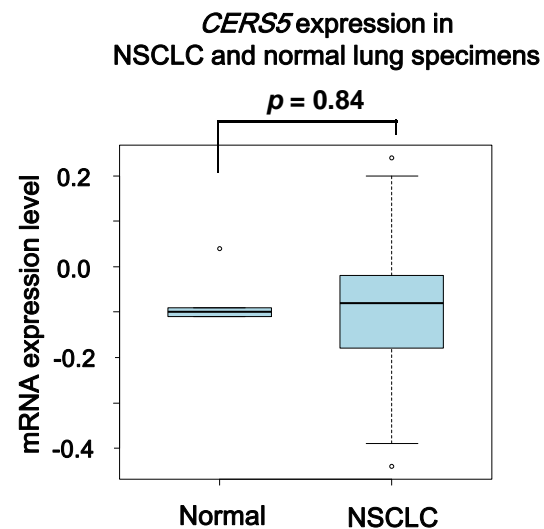

### B

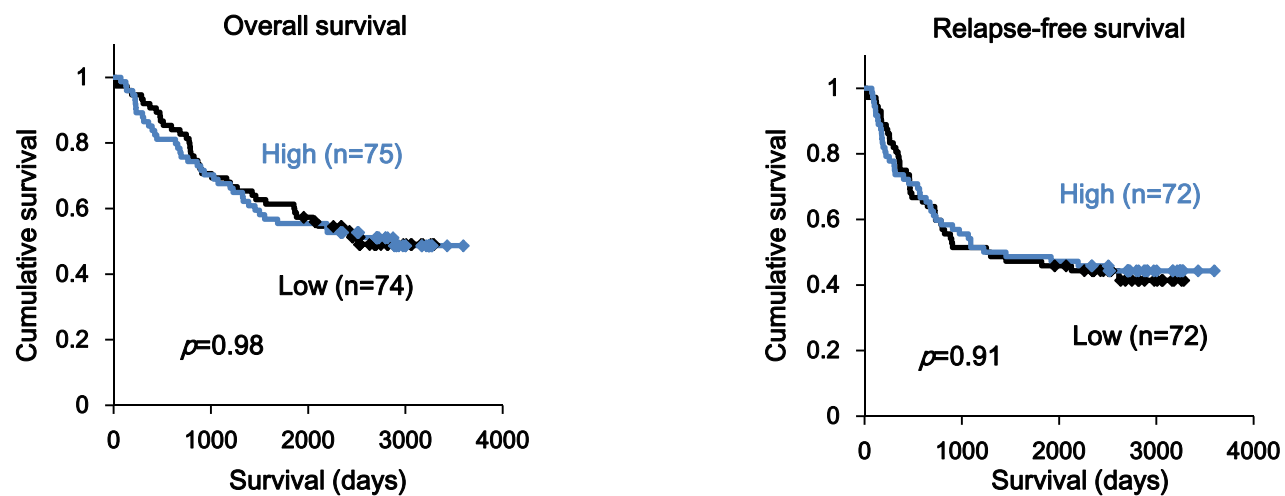

#### *CERS5* expression in NSCLC and normal specimens.

(A) Box plot analysis of mRNA expression levels of *CERS5* in the 141 NSCLC and normal tissues. Normal, 5 normal lung mixtures; NSCLC, 141 cases. (B) Kaplan-Meier analysis showing overall survival (high and low, 74 and 75 cases, respectively) and relapse-free survival (high and low, 72 and 72 cases, respectively) curves in the 149 NSCLC cases. The high and low groups were classified based on *CERS5* expression levels relative to the median value.

## Supplementary Fig. 3

### A

Predicted miRNAs targeting *CERS6*

| miRNA family        | Context+ score | miRanda | Detection |
|---------------------|----------------|---------|-----------|
| <i>hsa-miR-34a</i>  | -0.41          | Y       | Y         |
| <i>hsa-miR-217</i>  | -0.26          | Y       | N         |
| <i>hsa-miR-101</i>  | -0.23          | Y       | Y         |
| <i>hsa-miR-183</i>  | -0.17          | Y       | Y         |
| <i>hsa-miR-148a</i> | -0.19          | Y       | Y         |
| <i>hsa-miR-200c</i> | -0.10          | Y       | Y         |

### B

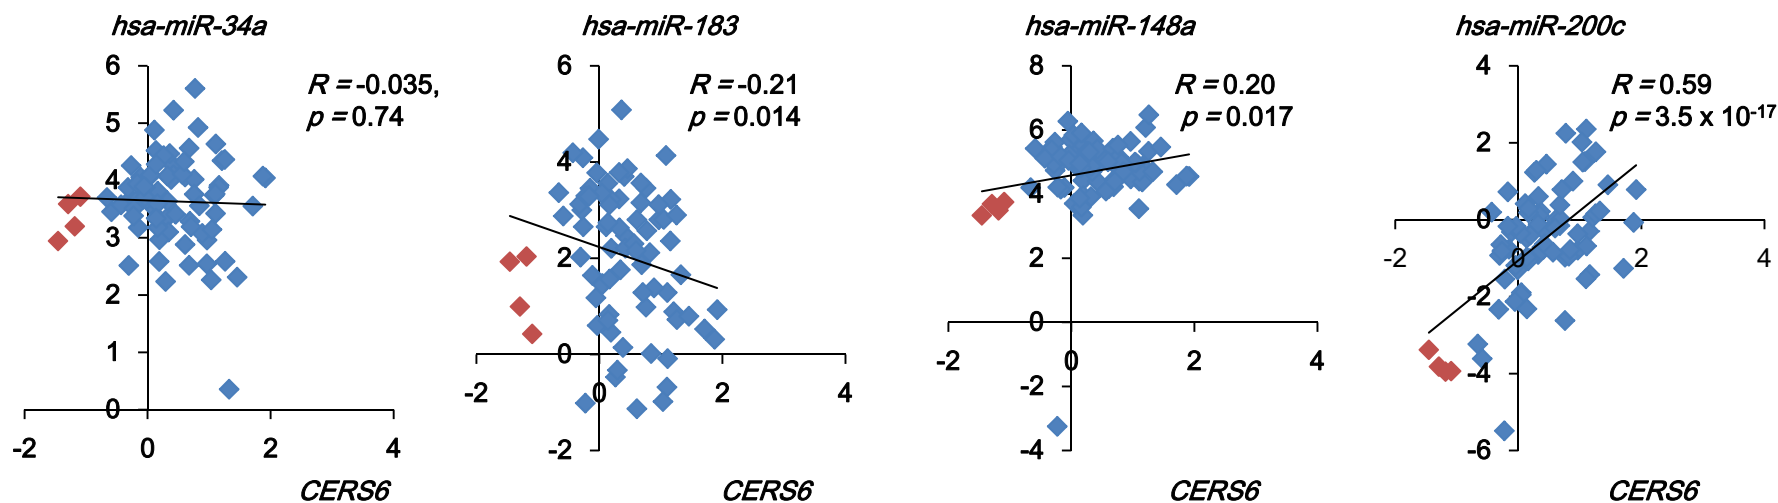

#### miRNA quantification using clinical specimens.

(A) Putative *CERS6*-targeting miRNAs were picked up using the prediction algorithms TargetScanHuman (Release 6.2) and miRanda. Conserved miRNAs were sorted according to the Context+ Score (TargetScanHuman). (B) Expression levels of the top 6 miRNAs in 79 adenocarcinoma (blue) and 4 normal (red) specimens were determined (Carcinogenesis 35; 2224-2231: 2014). In addition to *miR-101* (Fig. 2), sufficient expression levels of *miR-34a*, *miR-183*, *miR-148a*, *miR-200c*, but not *miR-217*, were observed.

## Supplementary Fig. 4

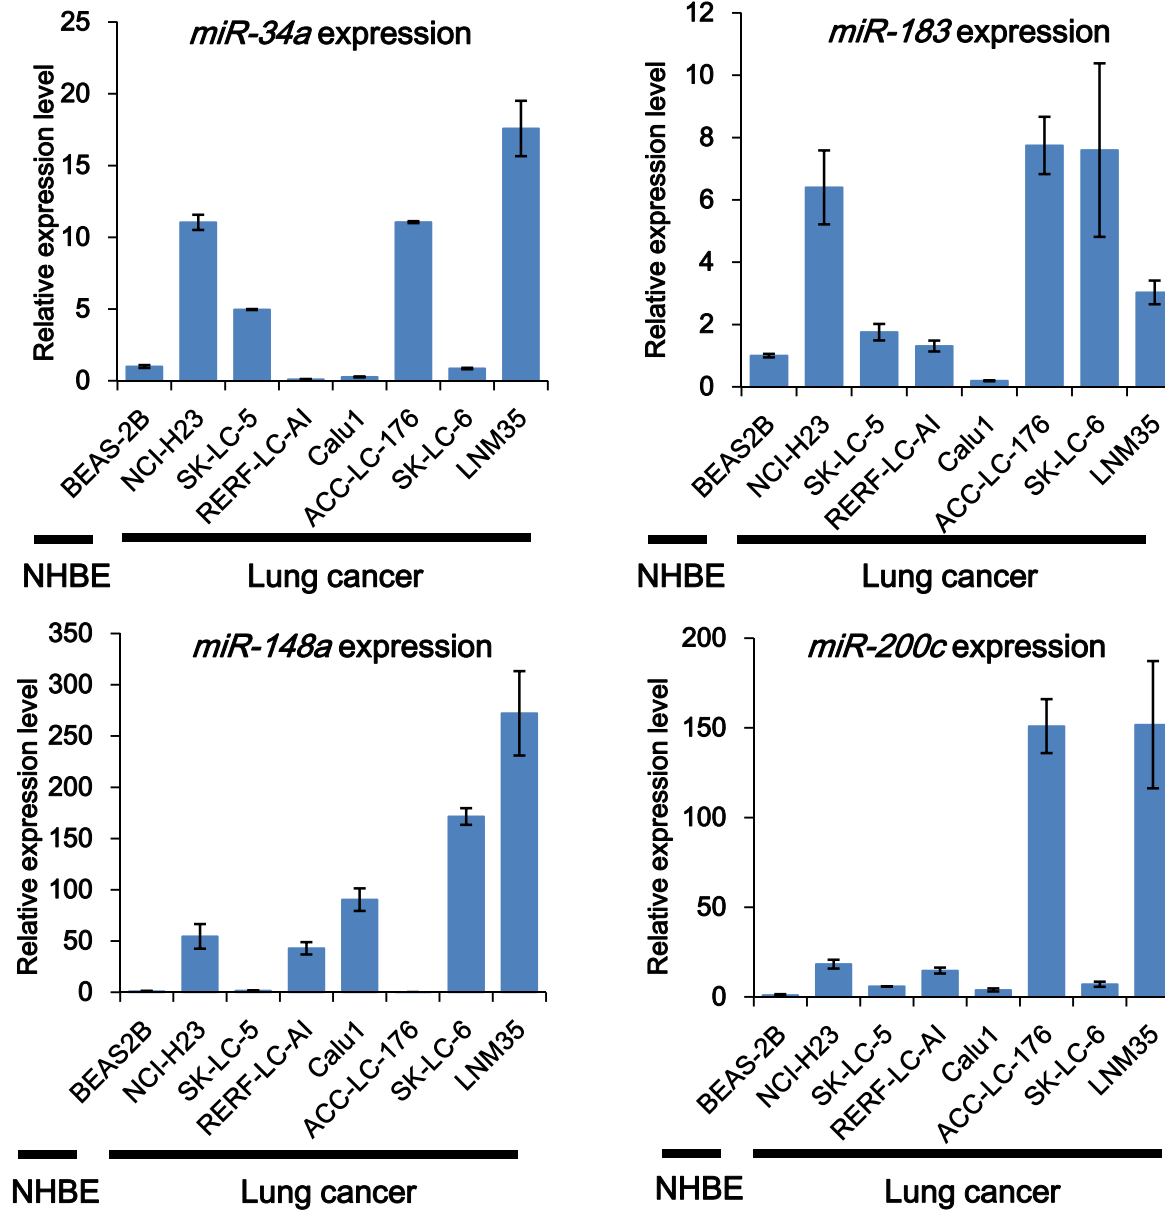

### miRNA quantification using cell lines.

(A) Relative expression levels of *miR-34a*, *miR-183*, *miR-148a*, and *miR-200c* in a normal human bronchial epithelial cell line (NHBE) BEAS-2B and a panel of lung cancer cell lines were determined by quantitative RT-PCR. Bars, mean  $\pm$  SD (n=3).



# Supplementary Fig. 5

## A

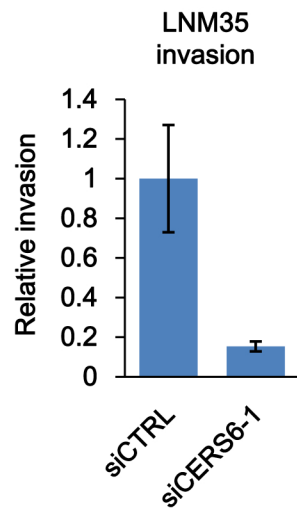

## B

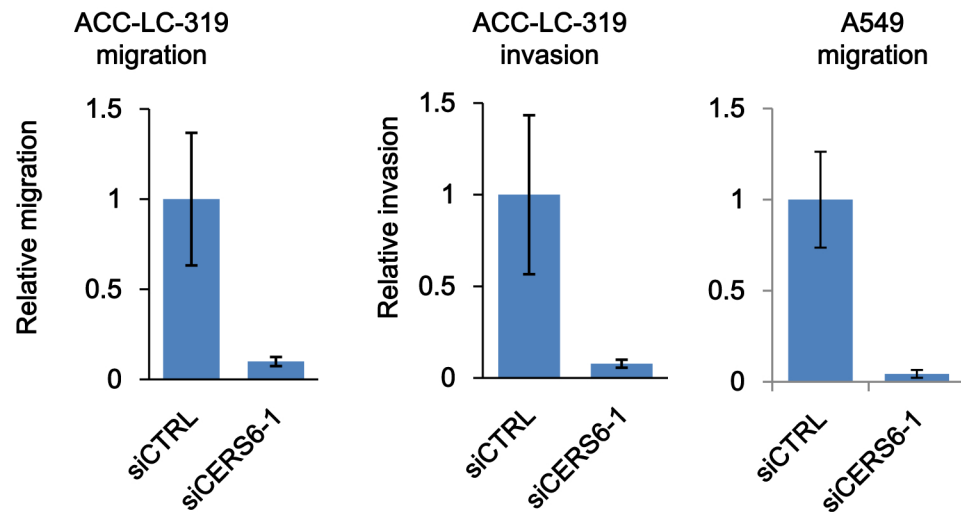

## C

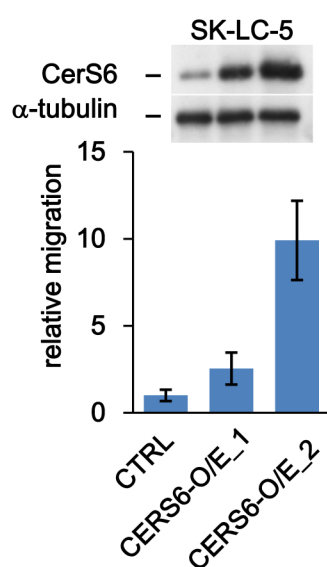

## D

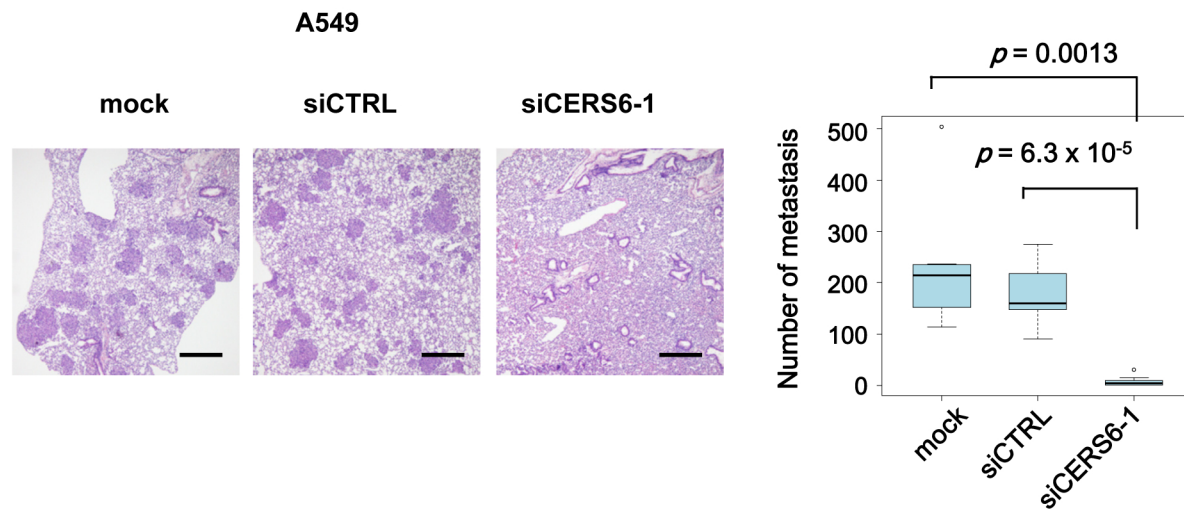

### Knockdown of CERS6 suppresses lung cancer metastasis.

(A) Invasion assay to determine effects of CERS6 knockdown in LNM35 cells. CTRL, negative control siRNA; siCERS6-1, siRNA targeting *CERS6*. Bars, mean  $\pm$  SD (n=3). (B) Migration and invasion assays were performed using ACC-LC-319 or A549 cells (n=4). (C) Migration assay to determine effects of CERS6 overexpression in SK-LC-5 cells. Two independent bulk clones were used. CERS6 expression levels are shown on top. (D) A549 cells were treated with mock, siCTRL, or siCERS6-1. Two days later,  $1 \times 10^6$  cells were injected into tail veins (n=8). Three weeks after injection, the mice were euthanized to analyze lung metastasis. Left, representative lung samples are shown. Bar, 5 mm. Right, the number of metastasis sites was quantitated. *p* values were calculated using a two tailed t test.

## Supplementary Fig. 6

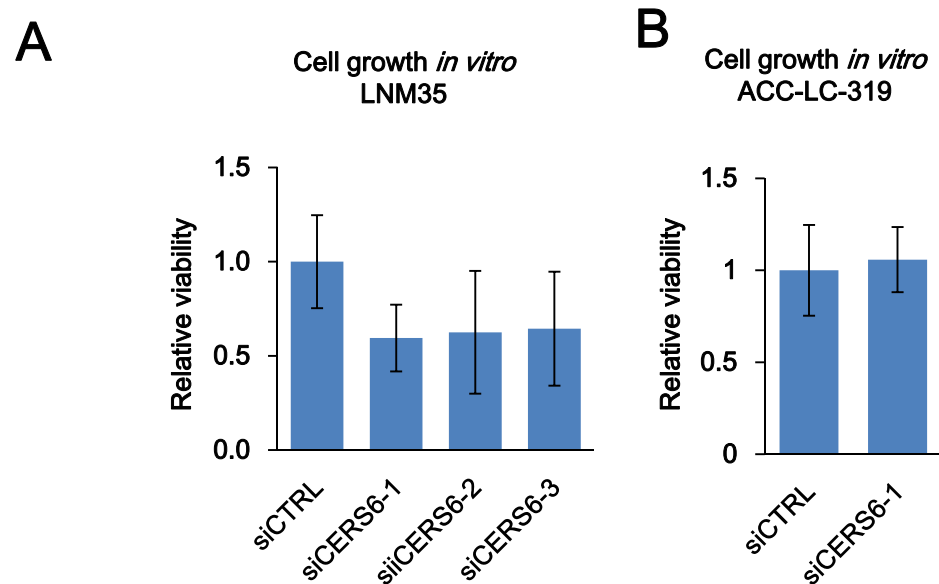

**CERS6 knockdown or overexpression shows marginal effects on cell proliferation.**

Five hours after LNM35 (A) or ACC-LC-319 (B) cells were treated with either 10 nM siCTRL or siCERS6-1~3, the culture medium was replaced with RPMI supplemented with EGF and N2 supplement. Cell viability was measured 48 hours after siRNA treatment. Bars, mean  $\pm$  SD (n=6).

## Supplementary Fig. 7

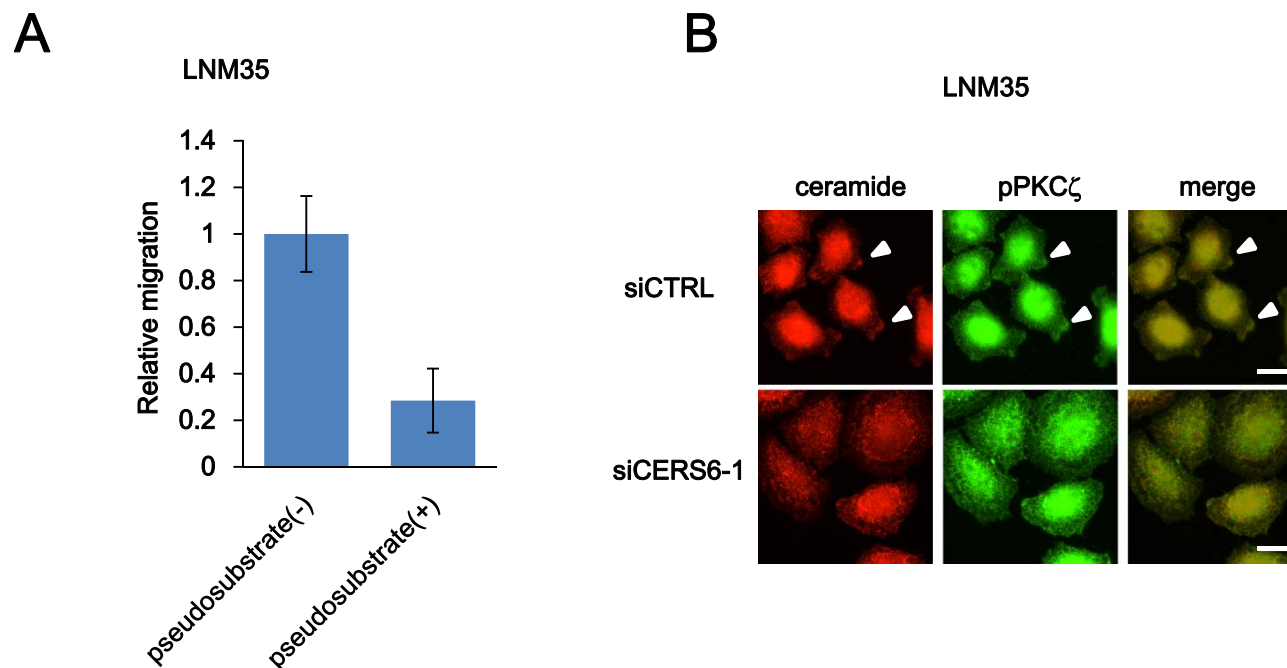

### **C16:0 ceramide may stimulate lamellipodia/ruffling formation through PKC $\zeta$ activation.**

(A) Migration assays were performed in the presence or absence of 1  $\mu$ M PKC $\zeta$  pseudo-substrate (Calbiochem). (B) Twelve hours after serum stimulation, cells were fixed and stained by anti-ceramide and anti-pPKC $\zeta$  antibodies. Bar, 10  $\mu$ m.

## Supplementary Fig. 8

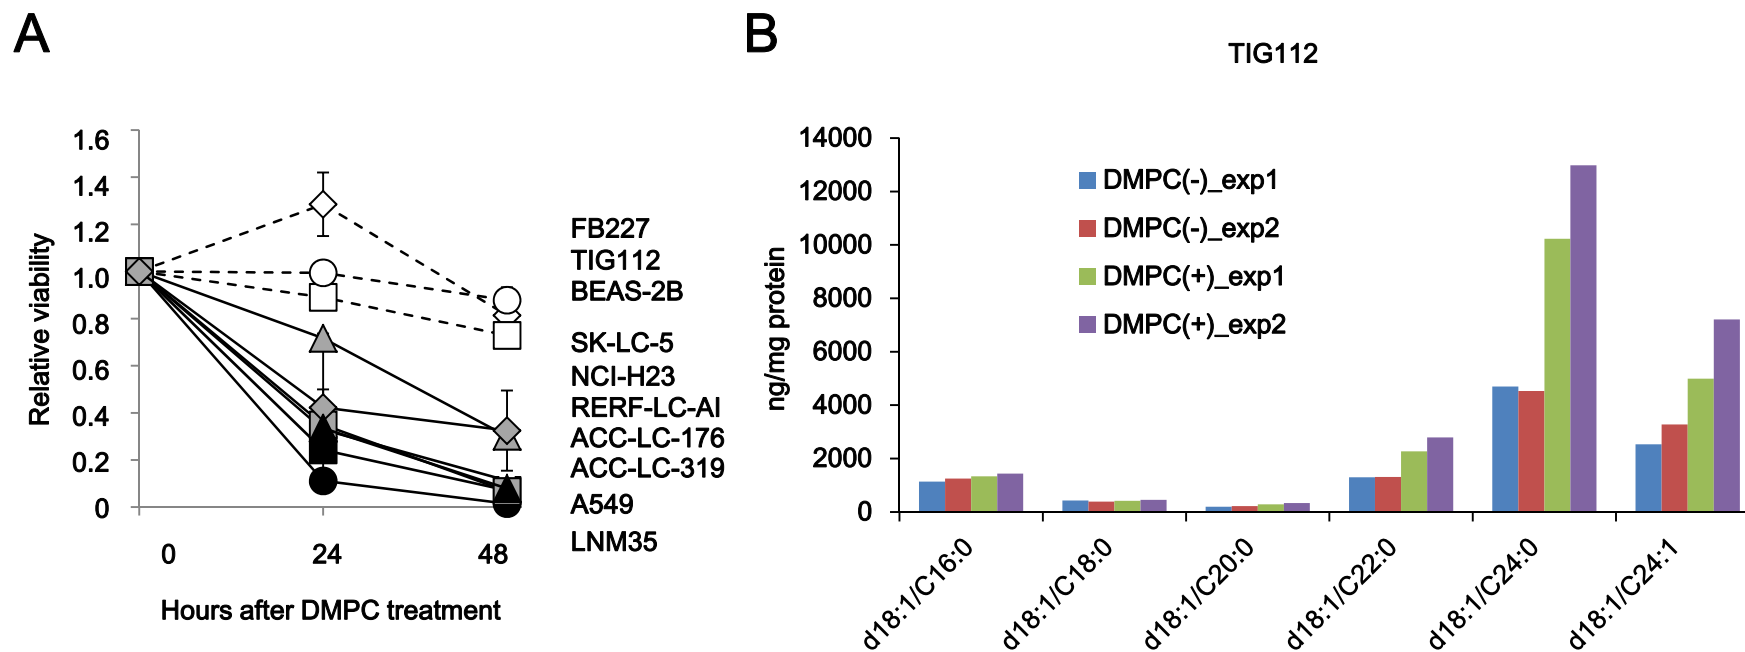

### Effects of DMPC liposome on cell survival in types of cell lines.

(A) MTT assays were performed for determining the viability of a panel of cell lines (ACC-LC-176, BEAS-2B, SK-LC-5, RERF-LC-AI, NCI-H23, A549, ACC-LC-176, LNM35, FB227, TIG112) after treatment with 200  $\mu$ M DMPC liposome. Data are shown as the mean  $\pm$  SD (n=3~8). (B) Eight hours after DMPC treatment (200  $\mu$ M), TIG112 cells were harvested and LCMS-IT-TOF mass spectrometry analysis was performed to quantify ceramide content. Results of duplicate experiments are shown.

## Supplementary Fig. 9

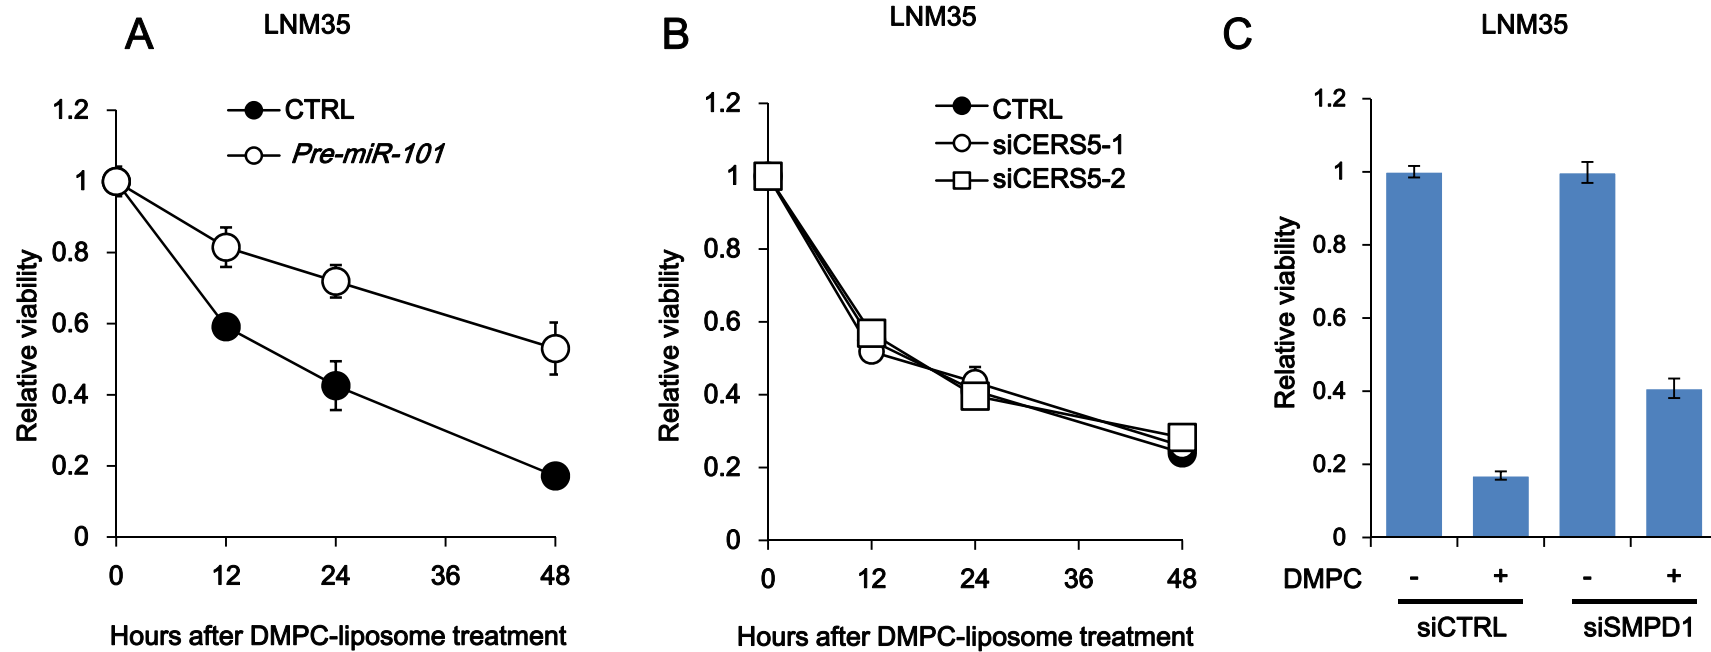

### ***miR-101* silencing attenuates apoptosis induced by DMPC liposome.**

(A) LNM35 cells were transfected with 1 nM CTRL or *pre-miR-101* for 48 hours, then further cultured with 100  $\mu$ M DMPC-liposome for 48 hours and viability was determined. Bars, mean  $\pm$  SD (n=3). (B) LNM35 cells were transfected with 20 nM siCERS5-1 or siCERS5-2 for 48 hours, then further cultured with 100  $\mu$ M DMPC-liposome for 48 hours and viability was determined. Bars, mean  $\pm$  SD (n=3). (C) LNM35 cells were transfected with 20 nM siSMPD1 for 48 hours, then further cultured with 100  $\mu$ M DMPC-liposome for 48 hours and viability was determined. Bars, mean  $\pm$  SD (n=3).

## Supplementary Fig. 10

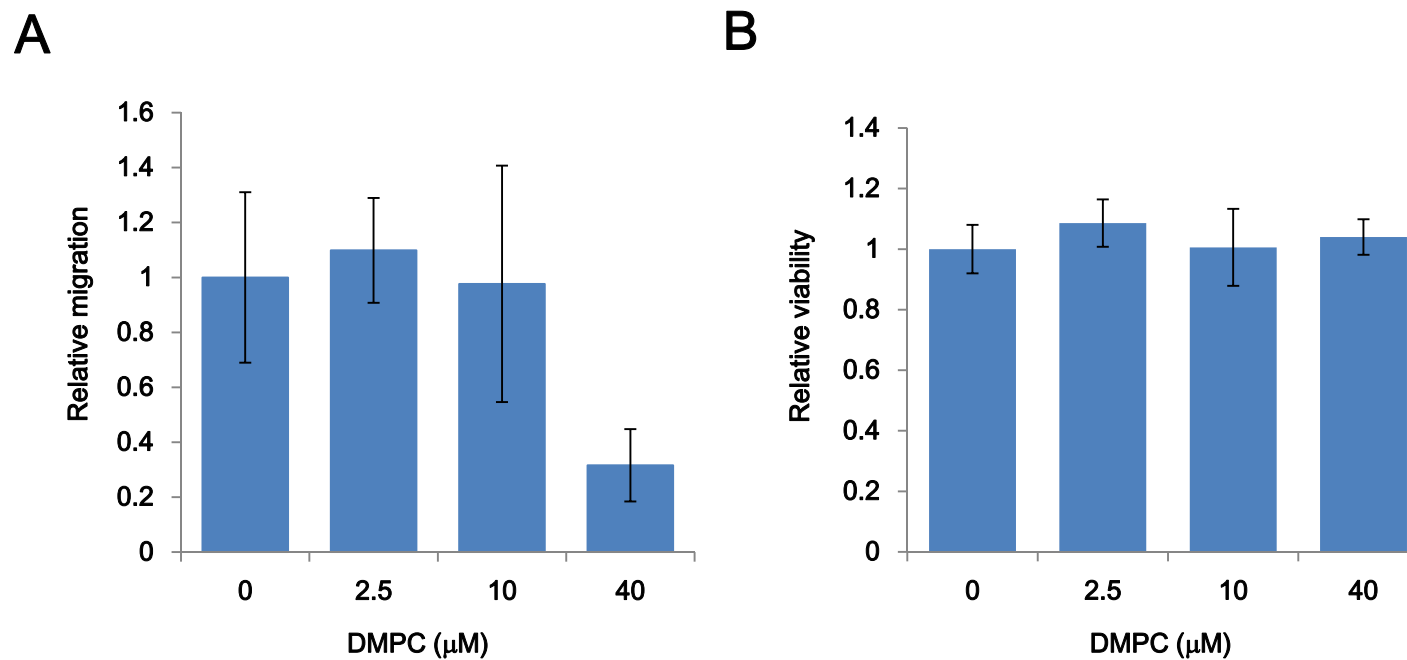

### Migration activity of LNM35 under sub-lethal DMPC concentrations.

(A) Cell migration assays were performed to determine the effects of 0-40 μM DMPC in LNM cells. Bars, mean ± SD (n=4). (B) Cell viability assays were performed to determine the effects of the various levels of DMPC. Bars, mean ± SD (n=8).

## Supplementary Fig. 11

**A**

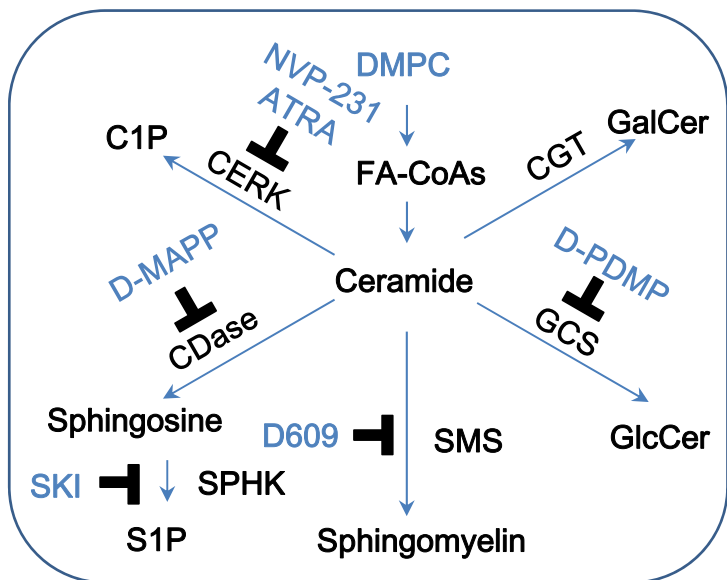

**B**

Co-effects of DMPC liposomes and D-PDMP derivatives

|                                                | IC <sub>50</sub> (μM) |
|------------------------------------------------|-----------------------|
| <b>D-PDMP</b>                                  |                       |
| IC <sub>50</sub> (DMPC <sub>0 μM</sub> ) [μM]  | 20.6 ± 1.7            |
| IC <sub>50</sub> (DMPC <sub>25 μM</sub> ) [μM] | 8.7 ± 0.6             |
| IC <sub>50</sub> (DMPC <sub>40 μM</sub> ) [μM] | 6.3 ± 0.6             |
| <b>D-PMMP</b>                                  |                       |
| IC <sub>50</sub> (DMPC <sub>0 μM</sub> ) [μM]  | 13.7 ± 2.4            |
| IC <sub>50</sub> (DMPC <sub>25 μM</sub> ) [μM] | 7.1 ± 0.5             |
| IC <sub>50</sub> (DMPC <sub>40 μM</sub> ) [μM] | 4.1 ± 0.3             |
| <b>D-PPMP</b>                                  |                       |
| IC <sub>50</sub> (DMPC <sub>0 μM</sub> ) [μM]  | 8.5 ± 1.1             |
| IC <sub>50</sub> (DMPC <sub>25 μM</sub> ) [μM] | 4.4 ± 0.8             |
| IC <sub>50</sub> (DMPC <sub>40 μM</sub> ) [μM] | 1.9 ± 0.1             |

**C**

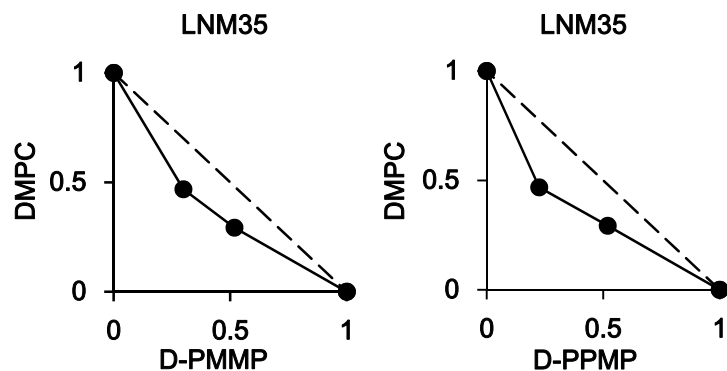

**D**

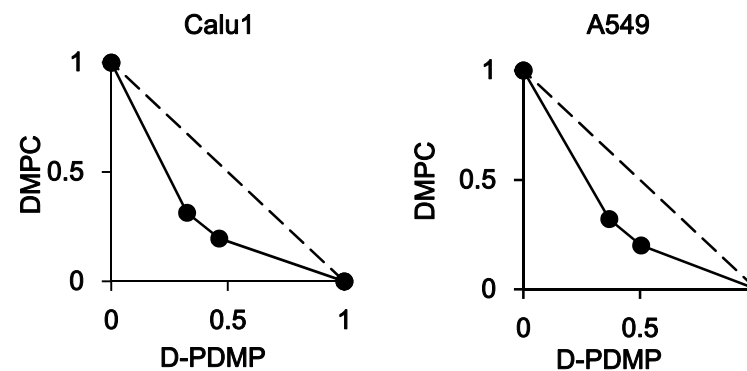

**DMPC liposome and D-PDMP derivatives show synergistic effects in cancer cells.**

(A) Overview of ceramide pathway inhibitors. NVP-231, ceramide kinase (CERK) inhibitor; D609, sphingomyelin synthase (SMS) inhibitor; SKI, sphingosine kinase (SPHK) inhibitor; D-MAPP, ceramidase (CDase) inhibitor; D-PDMP, glucosylceramide synthase (GCS) inhibitor. Note that ATRA transcriptionally suppressed ceramide kinase expression (J Neurochem 2010;112:511-520). (B) The co-effects of DMPC liposome and D-PDMP derivatives were determined in LNM35 cells. (C) Isobologram analyses of D-PDMP derivatives D-PMMP (left) and D-PPMP (right) in LNM35 cells. Horizontal and vertical axes show relative concentrations in D-PDMP derivatives and DMPC liposome, respectively. (D) Isobologram analyses of DMPC and D-PDMP in Calu1 and A549 cells.

## Supplementary Fig. 12

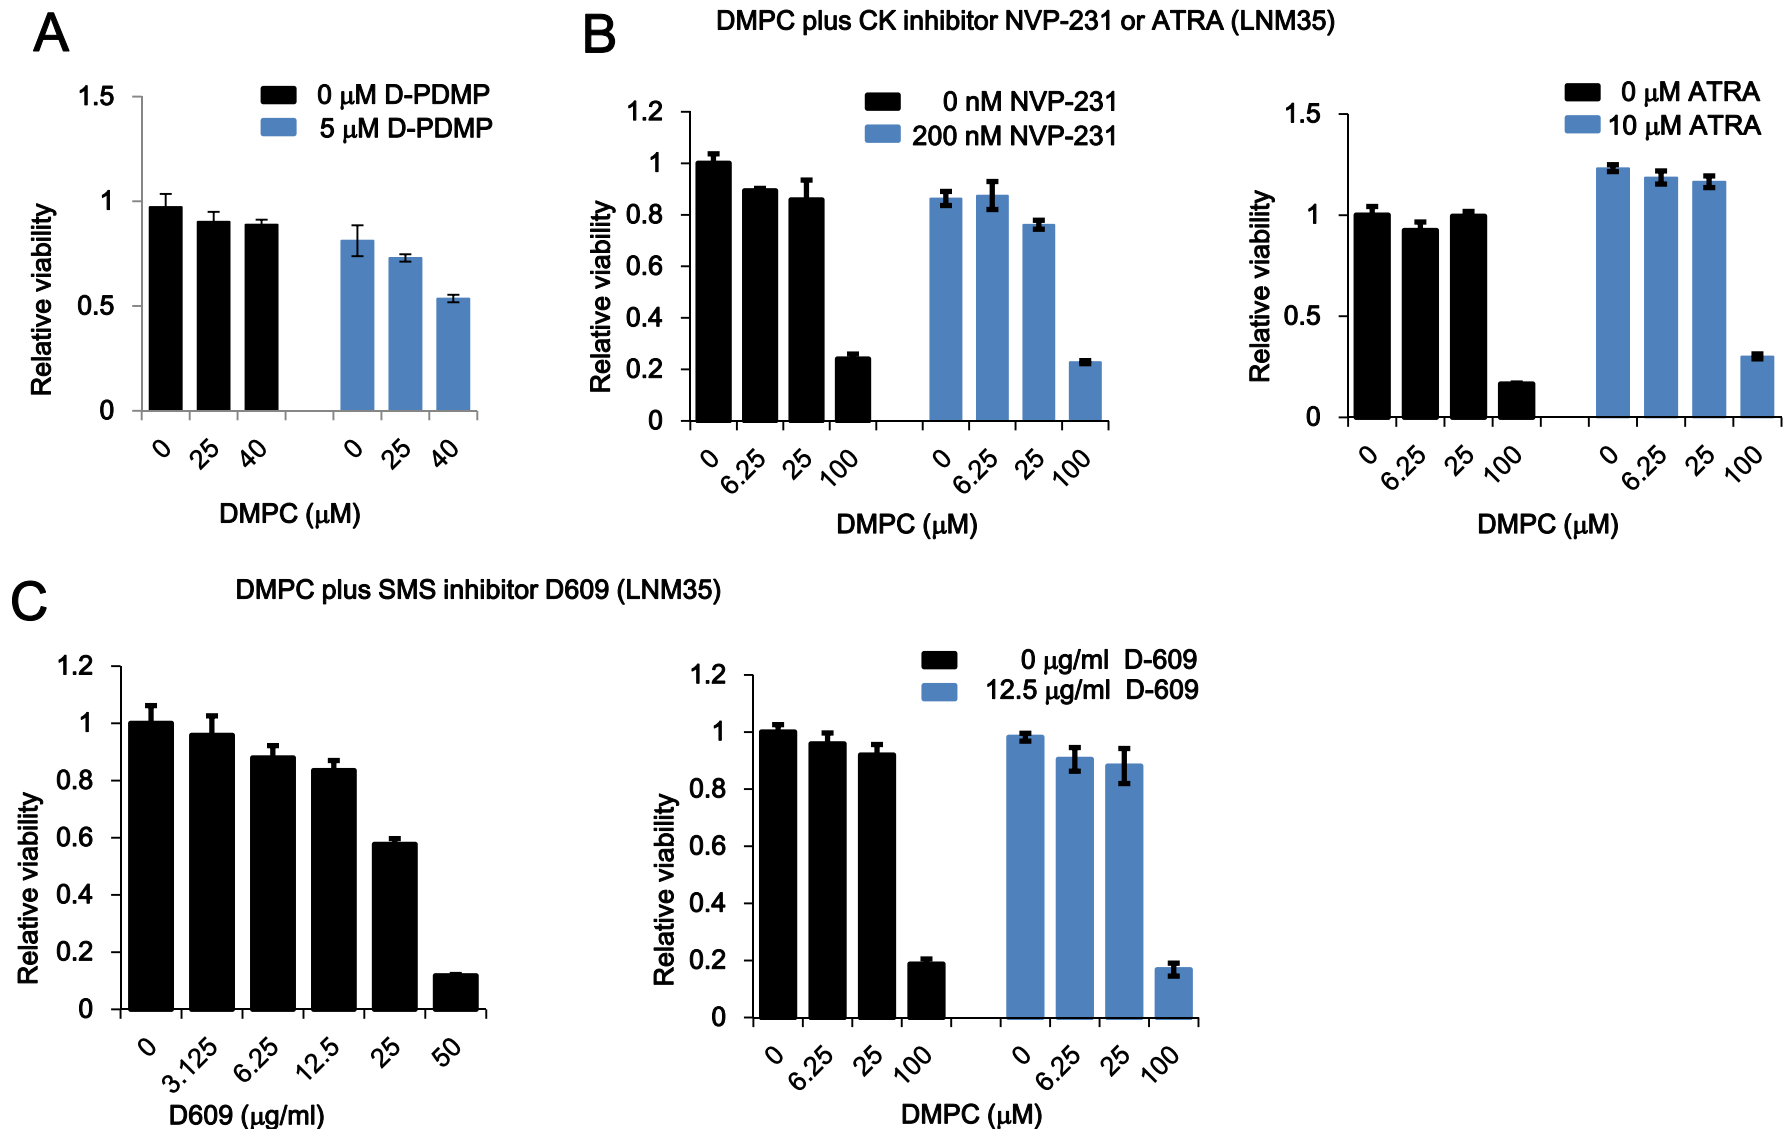

### Effects of D-PDMP, CKI or SMS inhibitor combined with DMPC liposome.

(A) Cell viability assays for LNM35 cells treated with various concentrations of DMPC liposome with or without 5 μM D-PDMP. Bars, mean ± SD (n=4). (B) Cell viability assays for LNM35 cells treated with various concentrations of DMPC liposome with or without 200 nM NVP-231 or 10 μM ATRA. Bars, mean ± SD (n=3). (C) Cell viability assays for LNM35 cells treated with various concentrations of D609 (left). DMPC liposome concentrations varied with or without 12.5 μg/ml D609 (right). Bars, mean ± SD (n=3).



## Supplementary Fig. 13

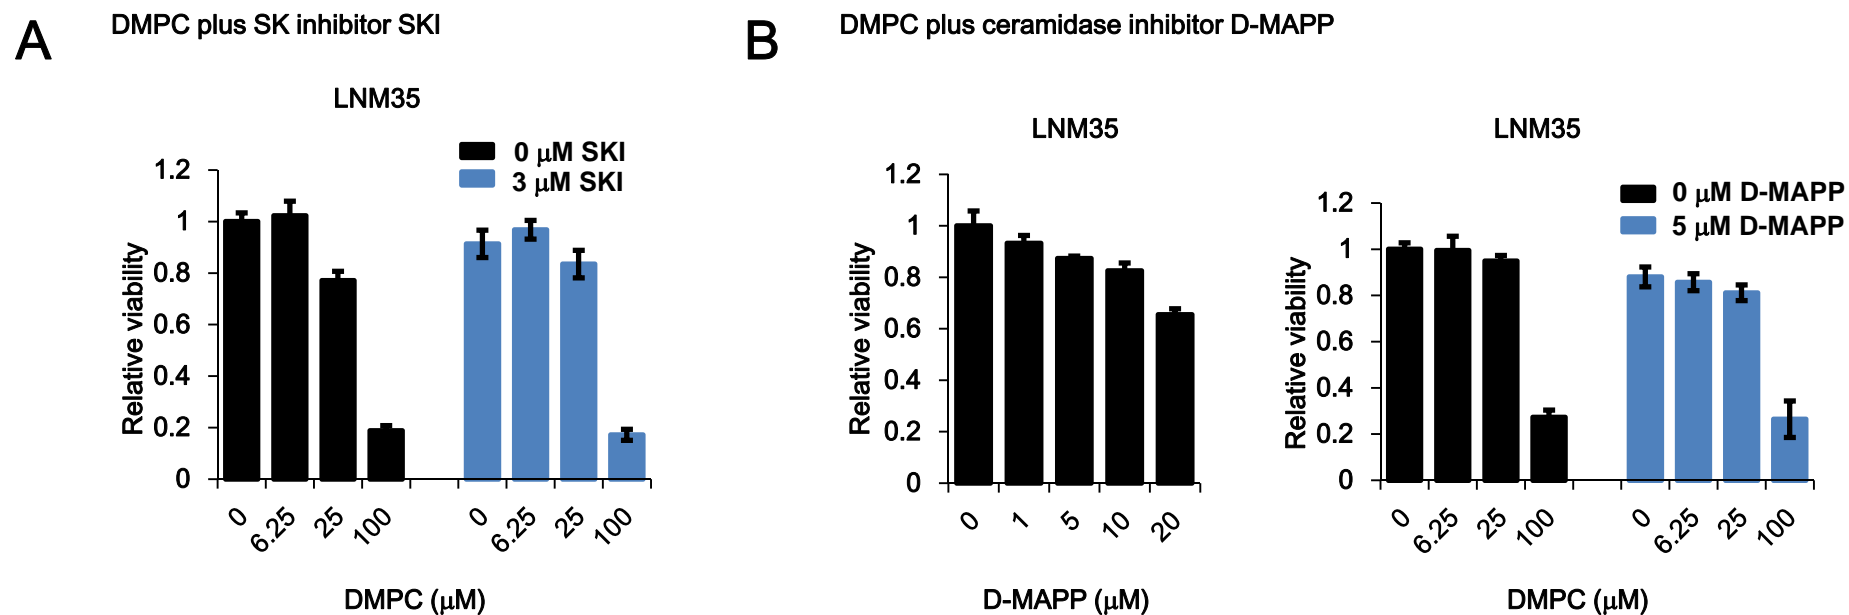

### Effect of SKI or D-MAPP combined with DMPC liposome

(A) Cell viability assays for LNM35 cells treated with various concentrations of DMPC with or without 3  $\mu\text{M}$  SKI. Bars, mean  $\pm$  SD (n=3). (B) Cell viability assays for LNM35 cells treated with various concentrations of D-MAPP (left). DMPC liposome concentrations varied with or without 5  $\mu\text{M}$  D-MAPP. Bars, mean  $\pm$  SD (n=3).

## Supplementary Fig. 14

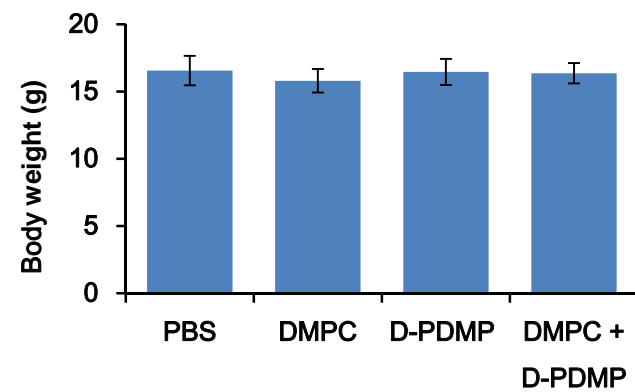

### Effects of DMPC liposomes and D-PDMP on body weights.

After 200  $\mu$ l of 50 mM DMPC and 2 mM D-PDMP were locally injected for 7 consecutive days, body weight was measured (n=5).
